# Supplementary material for: Controlled synthesis of hexagonal mesostructure silica and macroporous ordered siliceous foams for VOCs adsorption
Source: Royal Society of Chemistry journal article supplement (doi:10.1039/c4ra12553c), 2014-12-15
Supplement: c4ra12553c1.pdf [file c4ra12553c1.pdf]

### Supporting Information

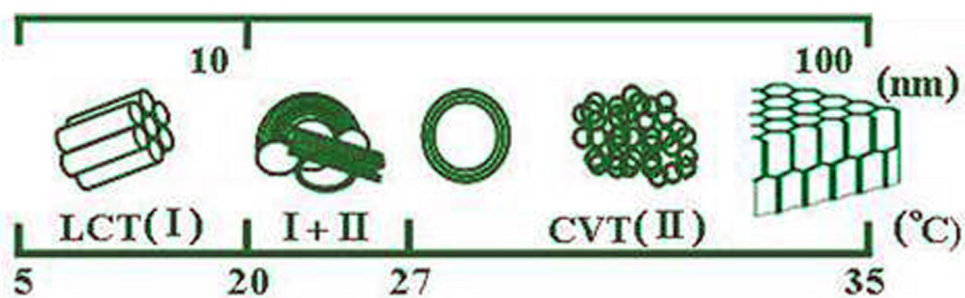

**Scheme S1** Evolution of siliceous structures with different pore diameters as a function of synthesis temperature when the other reaction conditions are exactly the same. The illustrated models are not to scale.

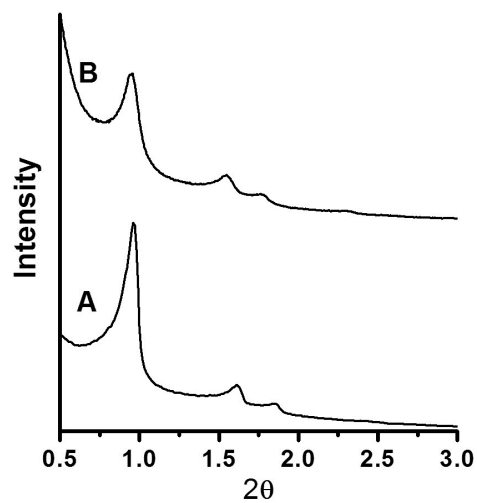

**Fig. S1** XRD patterns (A, B) of siliceous materials synthesized at 5 and 20 °C, respectively.

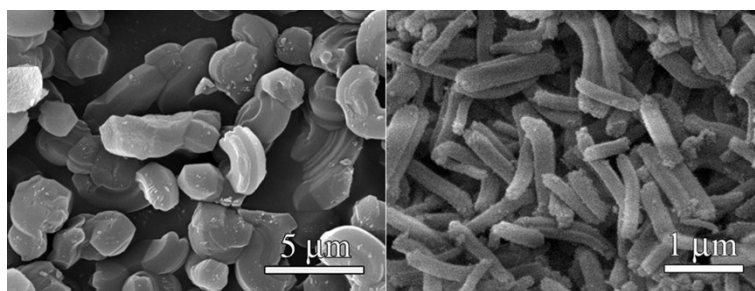

**Fig. S2** SEM images of siliceous materials synthesized at (left) 5 and (right) 20 °C, respectively.

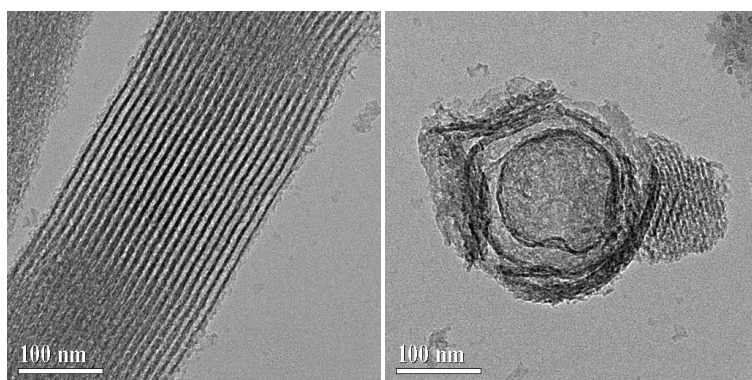

**Fig. S3** TEM image of siliceous materials synthesized at 20 °C.

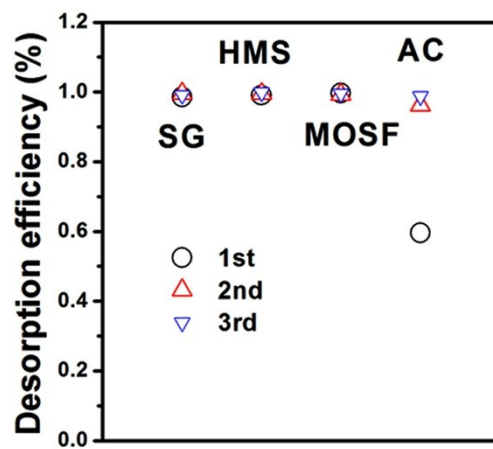

**Fig. S4** The comparison of desorption efficiencies of the three times of different samples.

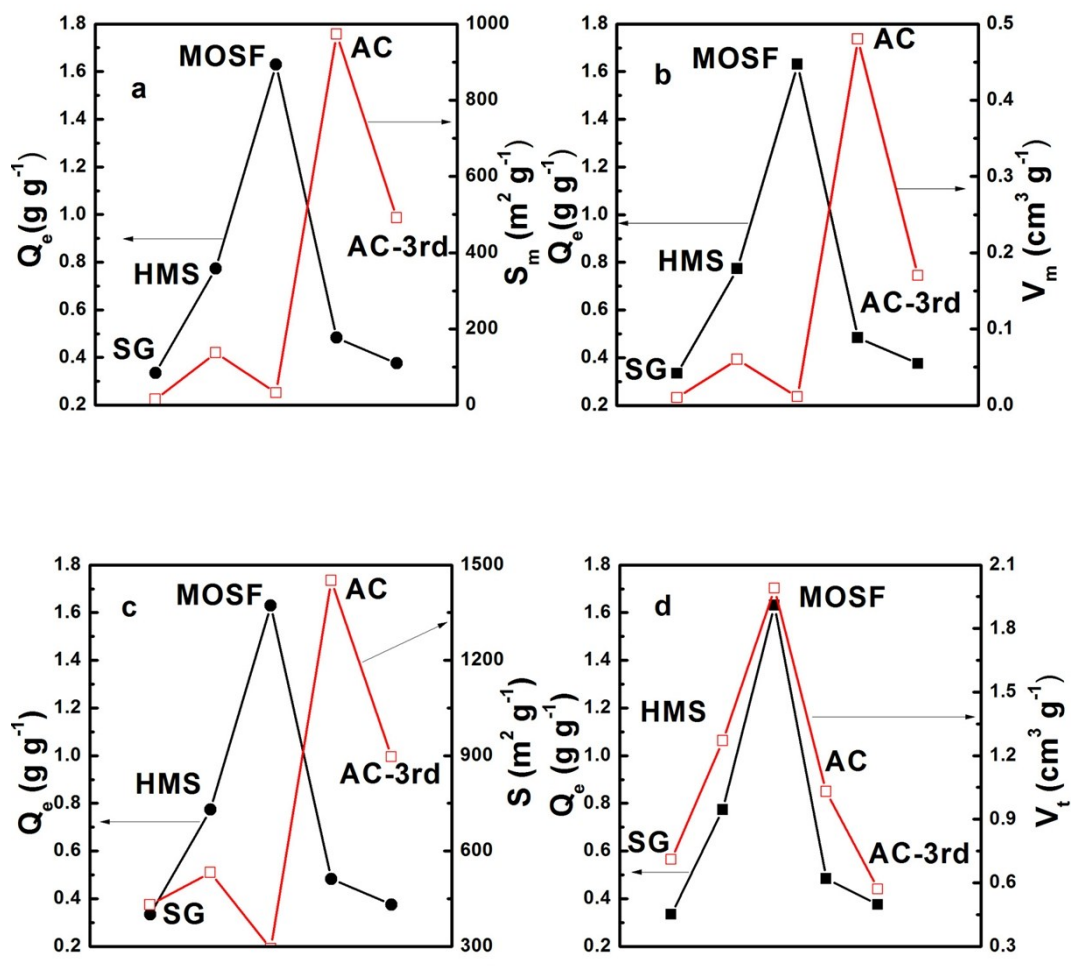

**Fig. S5** Relationship between dynamic n-hexane adsorption capacity and structure parameters of different adsorbents, micro surface area (a), micro pore volume (b), surface area (c) and pore volume (d), respectively.

**Tab. S1** Structural parameters of the different samples.

| Sample | $S_{\text{BET}}$<br>( $\text{m}^2 \text{g}^{-1}$ ) | $S_{\text{m}}$<br>( $\text{m}^2 \text{g}^{-1}$ ) | $V_{\text{t}}$<br>( $\text{cm}^3 \text{g}^{-1}$ ) | $V_{\text{m}}$<br>( $\text{cm}^3 \text{g}^{-1}$ ) |
|--------|----------------------------------------------------|--------------------------------------------------|---------------------------------------------------|---------------------------------------------------|
| SG     | 430                                                | 15                                               | 0.71                                              | 0.010                                             |
| HMS    | 532                                                | 137                                              | 1.27                                              | 0.060                                             |
| MOSF   | 293                                                | 32                                               | 1.99                                              | 0.011                                             |
| AC     | 1451                                               | 973                                              | 1.03                                              | 0.48                                              |
| AC-3rd | 896                                                | 491                                              | 0.57                                              | 0.17                                              |

Note: AC-3rd is after the 3rd dynamic adsorption-desorption cycle.  $S_{\text{BET}}$ : BET surface area,  $S_{\text{m}}$ :

Micropore surface area,  $V_{\text{t}}$ : Total pore volume,  $V_{\text{m}}$ : Micropore volume.
